1 **Title**

2 From curiosity relief to epistemic surprise: complementary roles of the prefrontal cortex and  
3 the ventral striatum in the neural valuation of knowledge

4  
5 **Authors**

6 Romain Ligneul<sup>1,2\*</sup>, Martial Mermillod<sup>3</sup>, Tiffany Morisseau<sup>1,4</sup>

7  
8 **Affiliations**

9 <sup>1</sup>Institut des Sciences Cognitives, CNRS, Lyon, France

10 <sup>2</sup>Donders Institute for Brain, Cognition and Behavior, Nijmegen, The Netherlands

11 <sup>3</sup>Université Pierre Mendès France, LPNC, Grenoble, France

12 <sup>4</sup>Central European University, Budapest, Hungary

13 \*To whom correspondence should be addressed ([r.ligneul@donders.ru.nl](mailto:r.ligneul@donders.ru.nl))

14

15

16

17

18

19

20

21

22

23

24

25

26

27 **Number of figures:** 6 (+ 3 supplementary)

28 **Main text:** 4759 words

29 **Online methods:** 2949 words

30 **Figure captions:** 1133 words

31 **Abstract:** 187 words

32 **References (including Methods):** 53

## 33 **Abstract**

34

35 Epistemic curiosity (EC) is a cornerstone of human cognition that contributes to the actualization of our  
36 cognitive potential by stimulating a myriad of information-seeking behaviors. Understanding the neural  
37 control of EC requires interdisciplinary crosstalks at the theoretical and methodological levels. Using a  
38 trivia quiz performed under fMRI in which answer uncertainty was manipulated, we provide behavioral  
39 and neural evidence for an integrative model of EC inspired by predictive coding. Behavioral analyses  
40 supported a hypothesis derived from this theoretical framework according to which previously  
41 experienced surprise should reduce subsequent EC levels. While suppression of neural activity in the  
42 rostralateral prefrontal cortex implemented this key regulatory mechanism, the ventromedial prefrontal  
43 cortex coordinated with an array of other brain regions to integrate several dimensions of knowledge  
44 valuation, including surprise itself. Following the logics of temporal-difference learning, the ventral  
45 striatum encoded curiosity relief only when answer delivery was stochastic. Finally, curiosity, prior  
46 knowledge and surprise concurred to predict subsequent memory recall, with surprise mediating  
47 curiosity-driven memory benefits. By reconciling different views on the neurocognitive underpinnings  
48 of knowledge valuation, these findings may provide a fertile ground for the burgeoning neuroscience  
49 of curiosity.

50

51

52

53

54

55

56

## 57 Introduction

58

59       Termed epistemic curiosity (EC), the “motivation to know” predicts educational success<sup>1</sup>,  
60 orients our attention<sup>2,3</sup> and underlies many decisions of our everyday life, such as opening a book,  
61 browsing the internet, watching movies or engaging in trivia quizzes. To date, the complexity of  
62 curiosity-related behaviors remains however a challenging issue for the neurosciences of cognitive  
63 control, reinforcement-learning and memory. Deeply involved in individuals’ success for survival and  
64 reproduction, EC seems to outreach the information required to fulfill these essential needs. Indeed, it  
65 extends to issues with unclear or indirect biological value such as philosophy, cosmology or art.  
66 Following Aristotle’s thesis that “all men by nature desire to know”<sup>4</sup>, it has long been suggested that  
67 knowledge might act as an intrinsic reward and curiosity as an innate drive in humans<sup>5-7</sup>. Yet, such  
68 accounts implicitly turn knowledge itself into an evolutionary goal and leave aside the developmental  
69 and situational determinants of curiosity.

70

71       The predictive coding framework provides promising hypotheses to go beyond this conception  
72 of knowledge as a reward. Indeed, the fundamental principle of predictive coding is that a primary  
73 function of our cognitive systems is to actively reduce uncertainty relative to the upcoming states of the  
74 world, which constitutes a straightforward rationale for information-seeking behaviors. However,  
75 predictive coding accounts of curiosity must confront the “dark room” problem stating that, once  
76 specific sources of uncertainty have been addressed, avoiding stimulation and refraining from acting  
77 appear as the most efficient way to escape new sources of uncertainty<sup>8,9</sup>. Therefore, another principle is  
78 required to reconcile this framework with the manifold exploratory behaviors — including those  
79 energized by epistemic curiosity — that are not restricted to the short-term minimization of uncertainty  
80 (e.g googling the correct spelling of a word). Indeed, exploration often transiently increases uncertainty  
81 (e.g pressing the “random” button of a Wikipedia page) and occasionally leads to sustained doubtful  
82 states (e.g reading Descartes). In order to accommodate this objection, proponents of predictive coding  
83 have suggested that individuals would be born with (and would continuously update) second-order  
84 expectations regarding the average amount of surprise experienced when interacting with their  
85 environment, and that they would actively try to fulfill these expectations by engaging or disengaging  
86 behaviors susceptible of eliciting surprise<sup>9-11</sup>.

87

88       Here, we embed these two predictive coding principles (reducing uncertainty and adjusting the  
89 level of surprise experienced during exploratory behaviors) into a single, integrative model of epistemic  
90 curiosity (Fig. 1a). Inspired by the former concepts of “specific” and “diversive” EC early proposed by

91 Berlyne<sup>5,12</sup>, the model distinguishes two components of curiosity whose behavioral weights may vary  
92 from one person to another and from one context to another<sup>6,13</sup>. Specific EC is defined as the transient  
93 motivation to seek a solution to well-defined epistemic problems (e.g. reading a tutorial to make  
94 something work). By contrast, nonspecific (or diversive) EC is defined as the motivation to seek  
95 epistemic stimulation in general (e.g. reading a newspaper or going to cinema). Therefore, only  
96 nonspecific EC can stimulate the quest of genuinely new epistemic problems, as seen for example in  
97 people who appear to pursue knowledge “for its own sake”<sup>14</sup>. Nonspecific EC is also the only  
98 component adjusted to equate experienced and expected surprise, which turns into a clear-cut behavioral  
99 prediction: nonspecific EC level should increase when the environment is, on average, less surprising  
100 than expected, and vice versa (Fig. 1b).

101

102           Consequently, our model dissociates two cognitive processes elicited by the obtention of new  
103 information: curiosity relief and surprise (see also Table S1 summarizing the different concepts related  
104 to Fig. 1). Curiosity relief reflects the motivational process engaged whenever one becomes aware of a  
105 “gap” in one’s own knowledge<sup>7</sup>. In line with the first principle of predictive coding described above,  
106 these information gaps are hypothesized to elicit uncertainty states of negative valence<sup>13,15,16</sup>, so that  
107 their resolution might participate in the reinforcement of specific EC likewise pain relief participates in  
108 the reinforcement of escape behaviors<sup>17</sup>. By contrast, epistemic surprise goes beyond the reduction of  
109 knowledge gaps and relates to the incongruence of preexisting representations and incoming  
110 information. Indeed, while the obtention of new information can relieve specific states of ignorance, it  
111 can also challenge the coherence and the completeness of one’s own prior knowledge about a given  
112 topic. Finally, these transient surprise signals may be used update an estimate of the average surprise  
113 experienced by the organism leading to the adjustment nonspecific EC levels.

114

115           Supporting the assumptions of predictive coding, numerous findings in humans and animals  
116 indicate that attentional allocation and exploratory behaviors increase for stimuli or contexts associated  
117 with intermediate amounts of uncertainty, while they decrease when uncertainty becomes too high or  
118 too low<sup>2,3,7,12</sup>. For example, in trivia quizzes, participants report higher curiosity when confidence in  
119 their guesses is intermediate<sup>18</sup>. Yet, no study has explained how fluctuations in uncertainty dynamically  
120 control EC levels, nor has addressed the neural implementation of this homeostatic regulation, which is  
121 timely for curiosity research<sup>19,20</sup>. In the field of reinforcement-learning, the combination of elaborate  
122 decision-making tasks, computational modeling and neuroimaging recently showed the rostralateral  
123 prefrontal cortex (rIPFC) monitors uncertainty and mediates its impact on exploration<sup>21–23</sup>. Since  
124 exploratory decisions are generally associated with heightened rIPFC responses<sup>24</sup> and that exogenous  
125 inhibition of rIPFC activity causally reduces the frequency of such decision<sup>25</sup>, it would therefore be

126 logical for the suppression of EC by average surprise (as hypothesized in our model) to depend on a  
127 suppression of rIPFC activity in response unexpected pieces of knowledge.

128

129 Unfortunately, while surprise can be readily manipulated and framed as an information-  
130 theoretic or Bayesian quantity in decision-making tasks involving monetary reinforcers, surprise in the  
131 context of epistemic curiosity research depends on high-level representations about the world, which  
132 are themselves dependent upon an open-ended prior knowledge shaped by language. Although the  
133 hippocampus seem to play an important role by acting as a mismatch detector<sup>26,27</sup> when clear-cut  
134 expectations can be computed (e.g based the training phase of associative learning tasks), the number  
135 of possible alternatives is often too wide to be represented *a priori* in more ecological situations such  
136 as trivia quizzes. Therefore, contrary to the well-known mechanisms underlying reward prediction  
137 errors and despite its putative importance for curiosity-driven memory encoding<sup>28,29</sup>, the  
138 neurobiological origins of epistemic surprise remain virtually unknown when computed *a posteriori*.  
139 Nevertheless, because of its role in schema-based memory<sup>30-32</sup> and its intense connectivity with the  
140 hippocampus<sup>33</sup>, the ventromedial prefrontal cortex (vmPFC) may appear as a good candidate for  
141 deriving such signals based on an *ex post* comparison of new information with the content of episodic  
142 or semantic memory.

143

144 Regarding curiosity relief, electrophysiological studies demonstrated that the satisfaction of  
145 rudimentary curiosity states recruits dopamine neurons in the brainstem, hence explaining why non-  
146 human primates are willing to endure costs in order to obtain advance information about upcoming  
147 rewards<sup>19,34</sup>. Given that striatal BOLD responses are themselves modulated by dopamine<sup>35</sup>, it was  
148 tempting to speculate that the relief of EC would recruit this key reward-related area in humans.  
149 Consequently, two fMRI studies based on trivia quizzes suggested that the striatum encodes curiosity  
150 states at the question stage, in its dorsal<sup>18</sup> or ventral parts<sup>36</sup>. Yet, these studies reported no modulation  
151 of the ventral striatum or other reward-related areas at the time of answers — which were systematically  
152 delivered — whereas such activations were observed in a perceptual curiosity paradigm<sup>37</sup> — in which  
153 curiosity was relieved in 50% of the trials. Since this dependency to uncertainty is highly consistent  
154 with the principle of temporal-difference (TD) learning<sup>17</sup>, we hypothesized that the striatal encoding of  
155 curiosity relief might be observed when trivia answers are delivered in a stochastic rather than  
156 systematic manner (Fig. 1c).

157

158 In order to provide behavioral evidence for this integrative model of EC and to test our  
159 hypotheses regarding its neural implementation, we used a two-step trivia quiz (Fig. 2) designed to  
160 induce curiosity and manipulate answer uncertainty in 22 participants undergoing fMRI. Our quiz

161 focused on cinema because of the widespread interest in this domain across sexes, cultures, and  
162 education levels. This choice also facilitated the standardization of answers (which were always movie  
163 titles) and the evaluation of prior knowledge related to them (titles watched or not by the participant).  
164 During the first part of the quiz (run 1), participants rated their curiosity for 60 cinema-related questions.  
165 After each rating, the answer to the question was either revealed (50%) or replaced by hashtags (50%),  
166 hence generating uncertainty regarding the relief of curiosity. In the second part (run 2), the same 60  
167 questions were presented again and participants were asked to indicate whether they remembered the  
168 answer or not. At this point, questions that had not been answered in run 1 could still elicit curiosity  
169 and their associated (new) answers could still elicit surprise, whereas remembered items served as  
170 controls, matched with the former in terms of visual stimulation and epistemic content thanks to  
171 counterbalancing. After the main task, a localizer involving individualized sets of new movie titles was  
172 used to reveal the brain regions responding to prior knowledge in a task-independent fashion (run 3).  
173 Unannounced post-test questionnaires were finally administered outside the scanner, including a recall  
174 test as well as surprise and interest ratings for each trivia item.

175

176

## 177 **Results**

178

### 179 *Interplay of prior knowledge, curiosity and surprise for memory encoding*

180

181 Behavioral analyses demonstrated that possessing some prior knowledge related to the answers  
182 increased both curiosity ratings ( $t(21)=2.46$ ,  $p=0.023$ ) and surprise ratings ( $t(21)=4.86$ ,  $p<0.001$ ) (Fig.  
183 3a). Moreover, curiosity and surprise were positively correlated to each other ( $r=0.22$ ,  $p<0.001$ , ratings  
184 z-scored for each participant individually; Fig. 3b) and a repeated-measures ANOVA confirmed that  
185 curiosity predicted surprise ratings ( $F(2,42)=27.4$ ,  $p<0.001$ ). Moreover, curiosity, surprise and prior  
186 knowledge were all positively associated with recall performances (whether the response was correct  
187 or not in the post-scan memory test) according to median-split analyses separating items as a function  
188 of high and low curiosity ( $z=3.88$ ,  $p<0.001$ ), surprise ( $z=3.32$ ,  $p<0.001$ ) and prior knowledge ( $z=3.81$ ,  
189  $p<0.001$ ; Fig. 3c).

190

191 In order to exclude the possibility that prior knowledge, curiosity and surprise would simply  
192 reflect a common latent variable (e.g. attention), we used a Generalized Estimating Equations approach  
193 (see Methods, Behavioral analyses). The three factors were individually significant in this analysis  
194 (curiosity:  $\beta=1.27$ , Wald  $\chi^2 = 15.9$ ,  $p<0.001$ ; surprise:  $\beta=0.43$ , Wald  $\chi^2 = 10.2$ ,  $p=0.001$ ; prior

195 knowledge:  $\beta = 1.58$ , Wald  $\chi^2 = 74.4$ ,  $p < 0.001$ ), hence confirming their additive contribution to  
196 memory encoding.

197

198 While the relationship between curiosity and surprise as well as the positive impact of curiosity,  
199 prior knowledge and surprise on recall were expected based on studies by Berlyne<sup>28</sup> and others<sup>20,29,36,38</sup>,  
200 a logistic mediation analysis including prior knowledge and condition (whether the answer had been  
201 seen once or twice during the experiment) further showed that surprise partly mediated the beneficial  
202 effects of curiosity on recall performances (indirect path:  $z = 3.47$ ,  $p < 0.001$ ; direct path:  $z = 3.64$ ,  $p < 0.001$ ;  
203 Fig. 3d; Supplementary Fig. 1a). Finally, items rated as more interesting were associated with higher  
204 surprise ratings ( $t(21) = 2.48$ ,  $p = 0.02$ ). However, although interest was also strongly related to memory  
205 performance (direct path:  $z = 3.72$ ,  $p < 0.001$ ) as expected from previous findings<sup>38</sup>, it did not mediate  
206 curiosity-driven memory benefits (indirect path:  $z = 1.31$ ,  $p = 0.21$ ).

207

### 208 *Surprise-dependent control of curiosity*

209

210 Our main hypothesis concerned the variation of nonspecific curiosity levels over time, as a  
211 function of the average amount of surprise recently experienced. In the computational approach used  
212 to tackle this issue (see Methods), we assumed that the subjective level of curiosity reported in  
213 participants' ratings (run 1) resulted from two distinct influences: (i) the motivation to relieve an acute  
214 ignorance state induced by the specific content of the question presented in any trial  $t$  (specific EC); (ii)  
215 the motivation to be exposed to any new information (nonspecific EC) conceived as an item-  
216 independent variable fluctuating slowly throughout the quiz. Importantly, the Rescorla-Wagner  
217 algorithm used to monitor the average amount of surprise was totally blind to the content of the  
218 questions and to the outcome of a trial  $t$ : consequently, it could only explain the variance associated  
219 with the nonspecific component of EC, based on previous items ( $t-1$ ,  $t-2$ , etc).

220

221 Supporting our hypothesis, a delta-rule that updated the average amount of surprise experienced  
222 in the quiz ( $Q\{\text{sur}\}$ ) outperformed a model that updated only the probability of knowledge delivery  
223 ( $Q\{0-1\}$ ) and models that included time as a regressor, either alone or in combination with any of the  
224 two delta-rules (Fig. 4a). Bayesian group comparisons treating model attribution as a random effect  
225 indicated that this conclusion held both when curiosity ratings were considered as a normally distributed  
226 variable or when they were binarized into high/low categories and predicted by means of logistic  
227 regression (see Methods and Supplementary Fig. 1b-d for details). Crucially, the overall effect of  
228 expected surprise on curiosity ratings was negative in both the continuous ( $t(21) = -2.95$ ,  $p = 0.008$ ) and

229 binomial cases ( $t(21)=-3$ ,  $p=0.007$ ), which confirmed that this variable exerted significant suppressive  
230 effects on EC ratings.

231

### 232 ***Monitoring of average surprise in the rostromedial PFC***

233

234 Next, we studied how the brain tracked changes in average surprise from one trial to another.  
235 To do so, we investigated the parametric encoding of surprise prediction errors ( $PE\{sur\}$ ) at the answer  
236 stage of run 1, during which variations of curiosity levels were assessed. Formally, this trial-wise  
237 variable corresponds to the surprise experienced in each trial minus the average surprise recently  
238 experienced. Restricted to a prefrontal mask spanning all voxels anterior to the head of the caudate  
239 (MNI:  $Y>22$ , see Methods), our analyses revealed a significant encoding of  $PE\{sur\}$  within the right  
240 rostromedial prefrontal cortex (Fig. 4b). The GLM excluded potential confounding effects of displaying  
241 answer *versus* hashtag (modeled as separate events), curiosity relief and prior knowledge (both included  
242 before  $PE\{sur\}$  in the serial orthogonalization procedure implemented by SPM, see Methods). Since  
243 parameter estimates were negative, we used a Finite Impulse Response model distinguishing outcomes  
244 (answer and hashtag) as a function of  $PE\{sur\}$ . It confirmed that stronger surprise prediction errors  
245 triggered proportional deactivations of the rPFC (Fig. 4c). Additional ROI analyses demonstrated that  
246 this rPFC area also encoded positively  $Q\{sur\}$ , with higher average surprise values associated with  
247 stronger rPFC responses at the question stage ( $t(21)=3.03$ ,  $p=0.006$ ). Finally, replacing  $PE\{sur\}$  by  
248 surprise ratings in the GLM (keeping every other aspect equal) demonstrated that the rPFC not only  
249 encoded  $Q\{sur\}$  and  $PE\{sur\}$  but also surprise itself ( $t(21)=-2.85$ ,  $p=0.009$ ).

250

251 Given that the cluster reported in Fig. 4b appeared more anterior and medial than expected  
252 based on the literature on uncertainty-driven exploration, we also assessed the effect of  $Q\{sur\}$  and  
253  $PE\{sur\}$  at previously reported locations<sup>21-24</sup>. Interestingly, a distinct activation pattern was observed at  
254 3 of these locations where  $Q\{sur\}$  was negatively encoded (Fig. 4e; peak from Daw et al:  $t(21)=-4.07$ ,  
255  $p<0.001$ ; peak from Boorman et al:  $t(21)=-3.52$ ,  $p=0.002$ ; peak from Donoso et al:  $t(21)=-$   
256  $2.81$ ,  $p=0.010$ ) and where no significant modulations by  $PE\{sur\}$  emerged at the group level. However,  
257 still at these 3 locations, the neural encoding of  $PE\{sur\}$  predicted the dynamical influence of  $Q\{sur\}$   
258 on curiosity ratings from one subject to another (Fig. 4f; peak from Daw et al:  $\rho=0.61$ ,  $p=0.003$ ;  
259 Boorman et al:  $\rho=0.69$ ,  $p<0.001$ ; Donoso et al.,  $\rho=0.53$ ,  $p=0.014$ ), while it was not the case at the peak  
260 reported in Badre et al. ( $\rho=0.24$ ,  $p=0.29$ ) or at the peak reported Fig. 4b ( $\rho=-0.09$ ,  $p=0.68$ ). In other  
261 words, a more posterior and lateral portion of the rPFC seemed to implement the control of nonspecific  
262 EC levels based on computations performed in the more medial and anterior site highlighted by our  
263 initial analysis.



264 ***Genesis of epistemic surprise in the medial PFC***

265

266 The vmPFC was among the various brain areas that discriminated strongly and reliably new  
267 answers from hashtag in the first run, as revealed by whole-brain analyses (Fig. 5a). The comparison of  
268 new answers and old answers in the second run produced a very similar pattern of activations which  
269 again included the hippocampus, the superior temporal sulcus (STS), the dlPFC and the precuneus (Fig.  
270 S2b; Table S3). Since vmPFC activations regularly co-occurred with activations in these structures and  
271 others, we systematically investigated the selectivity profile of the vmPFC together with 7 other regions  
272 of interest (Fig. 5b; see Methods for details), including the dorsomedial PFC (dmPFC) and the inferior  
273 parietal lobe (IPL) found to encode curiosity at the question stage (Fig. S2a), as well as the ventral  
274 striatum involved in curiosity relief (see Fig. 6a).

275

276 This multiple ROI analysis indicated that the vmPFC had an ideal selectivity profile to compute  
277 epistemic surprise signals. First, together with the precuneus, it discriminated genuinely new answers  
278 from old but forgotten ones (vmPFC:  $t(21)=3.74$ ,  $p=0.001$ ; precuneus:  $t(21)=3.94$ ,  $p<0.001$ , Fig. 5c).  
279 Second, the vmPFC and to a lesser extent the precuneus were the only regions sensitive to the prior  
280 knowledge variable (watched or not watched), during the trivia quiz (vmPFC:  $t(21)=2.82$ ,  $p=0.010$ ;  
281 Fig. 5d) and the localizer task (vmPFC:  $t(21)=3.14$ ,  $p=0.005$ ; Fig. 5e; Table S4). Third, along with the  
282 dmPFC and to a lesser extent the STS, the vmPFC encoded epistemic surprise itself ( $t(21)=3.47$ ,  
283  $p=0.002$ ; dmPFC:  $z=2.88$ ,  $p=0.005$ ; STS:  $t(21)=2.52$ ,  $p=0.019$ ; Fig. 5f).

284

285 In line with the influence of epistemic surprise on memory encoding, higher vmPFC activity  
286 also predicted subsequent recall of trivia answers in the post-scan memory test ( $t(21)=2.21$ ,  $t=0.03$ ; Fig.  
287 S2c). Although this effect did not survive the false-discovery rate criterion used to correct for multiple  
288 comparisons across ROIs, this finding remains remarkable since the regressor indexing “subsequent  
289 recall” was orthogonalized on curiosity, prior knowledge and PE{sur}. Finally, we observed that the  
290 encoding of epistemic surprise in the vmPFC correlated with how the model-based variable Q{sur}  
291 impacted nonspecific EC levels across participants ( $r=0.45$ ,  $p=0.039$ ) — a result consistent with the  
292 idea that the vmPFC could forward the results of its computations to the rIPFC.

293

294 ***Curiosity relief and tip-of-the-tongue events in the ventral striatum***

295

296 Epistemic surprise and its temporal integration into an average surprise signals are crucial for  
297 curiosity-driven memory benefits and for the regulation of nonspecific EC levels, respectively.  
298 However, our model also stresses that information-seeking behaviors are proximally motivated by the

299 relief of ignorance regarding specific information gaps. Thus, we first investigated curiosity relief in  
300 the first run of our task, which delivered answers in 50% of the trials. A whole-brain analysis showed  
301 that the ventral striatum was the only region that responded parametrically to curiosity at the answer  
302 stage (Fig. 6a). Importantly, this conclusion held when restricted to an anatomical mask of the nucleus  
303 accumbens (NAcc;  $t(21)=2.54$ ,  $p=0.02$ ; Fig. 6b), where no significant modulation by curiosity occurred  
304 when hashtags were displayed ( $t=0.03$ ,  $p=0.97$ ), hence excluding the possibility that curiosity-  
305 dependent modulation originated from the question or waiting stages (as reported by Gruber and  
306 colleagues<sup>36</sup>). Finally, in line with previous null findings<sup>18,36</sup>, no modulation of ventral striatal or NAcc  
307 activities were detected in the second run, in which curiosity was relieved in 100% of the trials (striatal  
308 ROI from Fig. 6a:  $t(21)=0.51$ ,  $p=0.6$ ; NAcc:  $t(21)=-1.34$ ,  $p=0.19$ ; Fig. 6b).

309

310 Subsequent analyses revealed that activations of the ventral striatum were not only elicited by  
311 stochastic curiosity relief: together with the hippocampus (see Fig. S2e-g), it was more activated by  
312 questions whose answers were known before the experiment (or remembered from run 1), as compared  
313 to question whose answers were unknown (run 1:  $z=3.25$ ,  $p=0.001$ , three participants ignorant of all  
314 answers excluded; run 2:  $z=2.77$ ,  $p=0.006$ ; Table S5). Intriguingly, the ventral striatum was also more  
315 activated by questions whose answers were presumably on the “tip of the tongue” (answered in run 1  
316 but reported as forgotten in run 2) than for questions with unknown answers ( $t(21)=3.13$ ,  $p=0.005$ ; Fig.  
317 6c), which indicates that this activation did not depend on successful retrieval contrary what was  
318 observed in the hippocampus (Fig. S2). Finally, among the eight ROIs discussed above (see Fig. 5b),  
319 the ventral striatum and the hippocampus were the only structures correlating negatively with  $Q\{\text{sur}\}$ ,  
320 the model-based variable tracking average surprise (ventral striatum:  $t(21)=-3.04$ ,  $p=0.006$ ,  
321 hippocampus:  $t(21)=-2.94$ ,  $p=0.008$ ; Fig. S2h).

322

323

## 324 Discussion

325

326 Taken together, our behavioral and neuroimaging results provide evidence for an integrative  
327 model of epistemic curiosity (EC) which dissociates several cognitive processes simultaneously  
328 triggered by the reception of new information (Fig. 1): (i) the relief of curiosity itself, encoded in the  
329 ventral striatum when knowledge delivery is stochastic rather than systematic; (ii) the comparison of  
330 new facts with prior knowledge, resulting in an epistemic surprise signal possibly generated by the  
331 vmPFC and facilitating memory encoding; (iii) the update of an average surprise variable computed by  
332 the rIPFC and involved in the dynamical control of nonspecific EC levels. These findings demonstrate

333 the complementary roles played by the prefrontal cortex and the ventral striatum in the neural valuation  
334 of knowledge and the regulation of EC. Moreover, they validate a non-trivial assumption of the  
335 predictive coding framework regarding the relationship between experienced surprise and subsequent  
336 curiosity levels.

337

338 First, our data indicates that curiosity-related activities elicited in the ventral striatum occurs  
339 only when knowledge delivery is stochastic, which supports our hypothesis that EC relief engages  
340 computations related to temporal-difference (TD) learning. Indeed, one prediction of TD learning is  
341 that the affective value of any awaited outcomes is represented in the reward circuitry as soon as it can  
342 be anticipated<sup>39</sup>. Thus, in contexts where questions are systematically answered, the motivational or  
343 affective signaling associated with EC should mostly occur at the question stage, as suggested by  
344 previous studies<sup>18,36</sup>. On the contrary, when answers are uncertain, higher EC levels can either translate  
345 into more interesting or more frustrating outcomes — depending on whether awaited information is  
346 delivered or not — so that outcome value cannot be anticipated. This latter context corresponds exactly  
347 to the first run of our trivia task delivering answers in only 50% of the trials and where ventral striatal  
348 signals proportional to EC relief were actually observed. This finding provides an important cog in the  
349 motivational machinery of information-seeking behaviors as it may help to reconcile two opposing  
350 views regarding the affective valence of acute curiosity states. Indeed, EC is sometimes envisioned as  
351 an appetitive state during which “epistemic rewards” are anticipated<sup>18,36</sup> or — instead — as an aversive  
352 state of ignorance to be relieved through information-seeking and exploratory behaviors<sup>7,40</sup>. From a TD-  
353 learning perspective, these two views may actually apply to different contexts, with appetitive processes  
354 being predominant when answer uncertainty is null or low (Fig. 1c, right panel) and aversive processes  
355 being predominant when it is high (Fig. 1c, left panel). In addition, our data suggests that the ventral  
356 striatum may encode the affective or motivational value of situations in which one has the feeling to  
357 know and/or anticipates the confirmation of an expected answer, as it was clearly more activated — in  
358 the second run — by question which had previously been answered as compared to unanswered ones.  
359 Yet, an alternative interpretation may be that ventral striatal activities at the question stage reflect the  
360 energization of goal-directed memory retrieval. Consistent with its hypothesized role in the  
361 motivational and cognitive control of mnemonic processes<sup>41</sup>, this view would explain why the striatum  
362 was also activated in front of questions for which answers remained the tip of the tongue, contrary to  
363 the hippocampus.

364

365 Second, our model emphasizes the pivotal importance of surprise signals, which go beyond the  
366 motivational processes engaged by curiosity relief. Indeed, if answers usually reduces the uncertainty  
367 associated with their corresponding questions, they can also be incongruent with prior knowledge, hence

368 triggering surprise. Surprise was positively correlated with curiosity ratings. This may be due to the fact  
369 that curiosity tends to increase attention<sup>2</sup>, which in turns modulate the amplitude surprise-related neural  
370 activities such as mismatch responses and prediction errors<sup>42,43</sup>. Moreover, consistent with the  
371 hypothesis that surprise gates the update of internal representations (i.e. encoding) like prediction errors  
372 do in reinforcement-learning or predictive coding<sup>44</sup>, it predicted subsequent memory recall and partly  
373 mediated curiosity-driven memory benefits. At the neural level, more surprising answers elicited  
374 stronger vmPFC responses, likewise answers associated with more prior knowledge and answers  
375 subsequently recalled in the postscan memory test. Therefore, the vmPFC seems ideally suited to  
376 compute epistemic surprise and to control memory encoding, as observed in our behavioral data. Yet,  
377 no definitive conclusions can be made at this stage because the precedence of surprise signaling in  
378 vmPFC compared to the dmPFC — which also encoded surprise — cannot be firmly assessed (given  
379 the limited temporal resolution of fMRI). Alternatively, the vmPFC may integrate inputs originating  
380 from different brain regions representing different variables (surprise, novelty, prior knowledge, etc.)  
381 into a global value signal (i.e. interest). A last possibility would be that different population of vmPFC  
382 neurons compute these surprise and value signals concurrently. Indeed, recent fMRI experiments and  
383 electrophysiological recordings showed that vmPFC activities can represent (i) knowledge value and  
384 confidence about knowledge<sup>45</sup> or (ii) reward valence and advanced information about rewards<sup>46</sup> in a  
385 multiplexed manner.

386  
387 Third, using a simple delta-rule to track the average amount of surprise experienced during the  
388 trivia quiz, we provide evidence for a key assumption of the predictive coding framework regarding the  
389 regulation of EC. Namely, we demonstrated that this average surprise variable robustly suppressed  
390 nonspecific curiosity levels, which fluctuated over time independently of questions' contents. This  
391 observation suggests that individuals might indeed regulate their level of curiosity and associated  
392 exploratory behaviors so that experienced surprise aligns with their expectations. The rIPFC appeared  
393 to implement this key process. Indeed, it encoded the amount of surprise recently experienced when  
394 participants processed new questions and surprise prediction errors when participants were presented  
395 with new answers. Importantly, stronger surprise prediction errors were associated with stronger  
396 deactivations of the rIPFC structure in response to more surprising answers. Although the functional  
397 meaning of negative BOLD responses constitutes a debated topic in the neuroimaging community<sup>47,48</sup>  
398 due notably to the paucity of papers reporting peristimulus time-course histograms, the activation  
399 pattern observed here is compatible with previous studies. For example, clear-cut deactivations of this  
400 prefrontal area have been documented in the context of semantic judgments<sup>49</sup> and in reinforcement-  
401 learning<sup>24</sup> tasks, where they have been associated with exploitative rather than explorative decisions.  
402 Yet, the representation of average surprise in the rIPFC proved to be highly complex. First, its encoding

403 was positive or negative depending on the exact spatial coordinates under scrutiny. Second, the analysis  
404 of interindividual differences revealed a positive correlation between the suppression of curiosity levels  
405 by surprise and the neural encoding of surprise prediction errors, but only in the posterior and lateral  
406 portion of the rLPFC cortex. This suggest a possible dissociation — within the rLPFC — of the neural  
407 populations monitoring average surprise and those implementing the influence of this variable over  
408 curiosity-related behaviors. Accordingly, the study of interindividual differences in a reinforcement-  
409 learning task recent suggested that the rLPFC area monitoring uncertainty may not be the exactly same  
410 as the rLPFC area implementing the influence of uncertainty on exploratory decision<sup>21</sup>.

411

412 Taken together, our findings support a neurocognitive model reconciling several processes  
413 involved in the upstream causes and the downstream consequences of epistemic curiosity. This model  
414 incorporates elements from the reinforcement-learning and the predictive coding literatures in order to  
415 articulate the “affective” and “cognitive” dimensions of EC, its relief by information and its dynamic  
416 regulation over time, as well as its tight relationship with memory encoding. Yet, further research is  
417 warranted to overcome some limitations of our study. First, it would be important to confirm the  
418 suppressive effect of average surprise in other tasks probing the willingness-to-pay or the willingness-  
419 to-wait for answers<sup>18,50</sup> and to cross-validate surprise ratings using related measures such as pupil  
420 dilation<sup>51</sup> or eye movements<sup>20</sup>. Second, our assessment of prior knowledge was confounded by the fact  
421 that people usually watch movies following willful, value-based choices. Although people naturally  
422 tend to value more cultural or scientific domains for which they are more knowledgeable (and vice-  
423 versa), this confound could be excluded by inducing — rather than merely assessing — prior knowledge  
424 in future experiments. Achieving more stringent control over prior knowledge will be key to confirm  
425 that introspective ratings of epistemic surprise indeed reflect a mismatch between the content of  
426 episodic or semantic memory and new information, as suggested here. Third, assessing the presence  
427 and the accuracy of expectations when processing trivia questions may help to disentangle the neural  
428 circuits signaling (i) surprise as a violation of active *a priori* expectations, and (ii) surprise as an  
429 incongruence with episodic or semantic representations retrieved *a posteriori*.

430

431 To conclude, understanding the regulation of EC and its neural implementation in the human  
432 brain will require intense research efforts in domains as diverse as memory, attention, linguistics and  
433 decision-making. This endeavour should build on the complementary insights provided by the  
434 reinforcement-learning and predictive coding frameworks, as well as other information-seeking  
435 principles such as learning progress maximization<sup>2</sup>. Taking into account the dynamical relationship  
436 between surprise and curiosity may help integrate these diverse literatures and open the path to more

437 autonomous systems in artificial intelligence and to new strategies of knowledge transfer in the  
438 classroom.

439

440

## 441 **Online Methods**

442

### 443 **Participants**

444

445 Twenty-two right-handed students (11 females, 11 males; mean age: 22.9; range: 19-28) were  
446 recruited through advertisements in an art cinema and via university mailing lists. This sample size  
447 matched the range of existing neuroimaging studies on epistemic curiosity<sup>18,36</sup>. No participant was  
448 excluded from data analyses. All were paid at the fixed rate of 60€ for their participation in the study.  
449 A few days before the experimental session, participants signed informed consent after exhaustive  
450 explanations were provided. They were also given a list of 215 movie titles and asked to indicate for  
451 each of them to what extent they knew the movie (from 1 = *never heard of it* to 4 = *seen it several times*).  
452 Target movie titles were covertly included in this list, which enabled us to quantify prior knowledge  
453 about trivia items (i.e. watched/unwatched status). For the behavioral experiment performed to select  
454 and validate the trivia used in the fMRI study, 64 participants of all ages were invited to complete a  
455 computerized evaluation of candidate trivia items (Supplementary Fig. 3a) after filing a consent form.  
456 The behavioral experiment took place in an art cinema (Comoedia, Lyon). After completing the task  
457 (about 20 minutes), they were offered to pick a book among a large selection of novels and essays. The  
458 entire protocol was approved by the local ethics committee of Sud-Est II, France (authorization number:  
459 2011-056-2).

460

### 461 **Stimuli**

462

463 Sixty question-answer pairs were selected amongst the 120 pre-screened trivia items  
464 (Supplementary Fig. 3a and Table S1). The trivia questions included in the fMRI experiment were  
465 chosen to maximize reported surprise, interest and knowledge about the target movies (Fig S3b). In  
466 addition, items were selected and designed to minimize the chances that participants would know or  
467 guess the answers. In the fMRI experiment, the frequency of known answers was therefore very low  
468 ( $5.5 \pm 6.1\%$ ; range: 0-18%) and known items were always modeled separately and excluded from all  
469 analyses (except for Fig. 5b). Moreover, we ensured that items associated with the two main conditions  
470 (i.e. items answered or not in the first run, see Fig. 1) were highly matched for characters count (for

471 both questions and answers), curiosity, surprise and interest (all  $p > 0.75$ ). Finally, we counterbalanced  
472 across participants the subsets of items associated with each condition.

473

474 For the prior knowledge localizer task, we used the 215-items questionnaire to create two personalized  
475 sets of movie titles, different from those encountered in the main trivia task: 30 watched movies (if  
476 possible, watched less than two years before the experimental session) and 30 unwatched movies (if  
477 possible, with titles known). For two participants who had not seen enough movies in the list, we  
478 included movies seen more than two years before within the pool of watched movies (10 and 26 items,  
479 respectively).

480

### 481 **Time course of the fMRI experiment**

482

483 At their arrival to the MRI lab, participants were reminded that they would be exposed to  
484 cinema-related trivia questions and warned that those questions had been selected for being interesting  
485 but rarely known, even to cinema lovers. Once in the scanner, they completed sixteen training items to  
486 improve self-calibration in curiosity ratings (those items were not redundant with those of the main  
487 task) after receiving the following instructions (hereafter translated from French):

488 *You are about to begin an experiment about intellectual curiosity and cinema in the specific conditions*  
489 *of the MRI scanner.*

490 *[Slide 1] During the calibration of the scanner and the acquisition of the anatomical image of our brain,*  
491 *you will practice the task that you will be doing while we will record your cerebral activities.*

492 *This training must in particular enable you to manipulate properly the response gauge with which you*  
493 *will indicate to what extent you are curious to know the answers to the questions we are going to present*  
494 *you.*

495 *[Slide 2, showing a fixation cross] Each trial will begin with a small symbol signaling that a question*  
496 *is about to appear.*

497 *[Slide 3, showing a dummy trivia question] After a few seconds, the question will appear. Take the time*  
498 *to read it properly. Once you have read it, press the left button (index).*

499 *[Slide 4, showing the gauge and the question] Once you press the button, the curiosity gauge will*  
500 *appear. By keeping the left button pressed, you can increase the gauge up to how much you are curious.*

501 *[Slide 5, showing the gauge and the question] If you are sure to know the answer, press the right button*  
502 *(major finger) when the answer comes to your mind. NB: if you think you know the answer but don't*  
503 *remember it (answer on the tip of the tongue), don't answer with the right finger but indicate your*  
504 *curiosity level.*

505 *[Slide 6] Once you have raised the gauge up to the level corresponding to your curiosity, a fixation*  
506 *cross will appear on the screen.*

507 *[Slide 7, showing the answer to the dummy question] Finally, the answer to the question will be*  
508 *displayed during a few seconds. However, during the first part of the experiment, we will only delivered*  
509 *50% of the answers. NB: there is NO relationship between your curiosity rating and the likelihood of*  
510 *of receiving or not the answer.*

511

512 In the first functional run, each trial started with a jittered fixation cross (exponential  
513 distribution; mean: 4.2s: range: 3-7.5 seconds). Then, participants had to read one of the 60 pre-screened  
514 trivia questions and to signal end of reading with a button press (right index finger; average reading  
515 time:  $5.1 \pm 1.49$ s). After a fixed interval of 750ms, a continuous gauge appeared. Participants had then  
516 to use their index finger to rate their curiosity by keeping the left button pressed until the gauge reach  
517 the desired point (maximum curiosity: 2.5s). In case they would know the answer already, they were  
518 instructed to answer with the right finger and then had to wait for 2s. Another jittered fixation cross  
519 (exponential distribution; mean: 4.2s: range: 3-7.5s) preceded the delivery of either an answer (50% of  
520 the trials) or hash tags “#” (3s, fixed duration). The temporal order of items was randomized for each  
521 participant independently.

522

523 In the second functional run, participants were verbally instructed that they would be presented  
524 again with all the questions, and that this time they would simply have to indicate whether the correct  
525 answer came spontaneously to their mind or not (average response time:  $3.7 \pm 0.83$ s). To do so, they had  
526 to select either a “light bulb” or a “cloud” associated with each situation, respectively (black and white  
527 drawings of similar size displayed on the left and right of the question; side counterbalanced across  
528 trials). All questions were again preceded and followed by a fixation cross (exponential distribution;  
529 mean: 4.2s: range: 3-7.5s). In this second run, answers were delivered in all trials (3s, fixed duration).  
530 The temporal order of items was re-randomized for each participant independently.

531

532 In the third functional run, participants were presented with 30 watched movie titles, 30  
533 unwatched movie titles, and 30 hashtags “#”. Each trial began with a fixation cross (mean: 2.5s: range:  
534 2-6s). Then a target was appeared on the screen for a fixed duration (3s) together with two dots,  
535 associated with the mentions “seen” and “unseen” (on the left and right of the movie title) or “skip” (on  
536 both side, in case of hash tags). The side of “seen” and “unseen” mentions was counterbalanced across  
537 trials and the temporal order of items was randomized for each participant independently.

538



539           Once outside the scanner, participants were first presented with an unexpected memory test in  
540 which they had to write down the answer of the 60 trivia questions encountered in the task. At this stage,  
541 they also reported which answers they were expecting ( $13.2\pm 8.8\%$ ) or knew already for sure ( $4.4\pm 5.1\%$ )  
542 before the task. Then, all questions and answers were shown together, and participants were asked to  
543 rate their surprise levels (from 1 “not at all” to 5 “yes, a lot”) and to report the thirty items they found  
544 the most interesting. To conclude, they filled an epistemic curiosity questionnaire <sup>6</sup> designed to capture  
545 specific (i.e deprivation) and diversive (i.e interest) EC. All behavioral tasks were programmed using  
546 Presentation ([www.neurobs.com](http://www.neurobs.com)).

547

#### 548 **fMRI acquisition**

549

550           Imaging was conducted on a Siemens Sonata scanner (1.5T), using an eight-channel head coil.  
551 Twenty six interleaved slices tilted relative to the anterior commissure – posterior commissure line (20-  
552 30°) were acquired per volume. We acquired an average of 837 echo-planar T2\*-weighted functional  
553 volumes per subject (TR = 2.5; TE = 60 ms; FOV = 220 mm; matrix = 64 x 64; voxel size = 3.4 x 3.4  
554 x 4mm). Following the fMRI session, a high-resolution T1-weighted anatomical scan was acquired.  
555 Before the functional acquisition, a gradient-field map was acquired using a gradient echo sequence and  
556 was applied for distortion-correction of the acquired functional images in order to improve local field  
557 homogeneity and minimize susceptibility artifacts, for example in the ventral parts of the prefrontal  
558 cortex.

559

#### 560 **fMRI preprocessing**

561

562           All preprocessing steps were performed using SPM8. The first four volumes of each run were  
563 removed to allow for T1 equilibrium effects. For each participant, functional images were time-  
564 corrected, realigned, unwarped using the magnitude and phase images, and coregistered to the  
565 anatomical scan. The six movement parameters were derived from the iterative realignment procedure  
566 carried out by SPM8 (three for translation, three for rotation). The anatomical scan was then normalized  
567 to the MNI space using the ICBM152 template brain and the resulting non-linear transformation matrix  
568 was applied to the functional images. Finally, the normalized functional images were spatially smoothed  
569 with an 8 mm Gaussian kernel.

#### 570 **fMRI analyses**

571

572           Statistical analyses of fMRI signals were performed using a conventional two-levels random-  
573 effects approach with SPM8. All general linear models (GLM) described below included the 6

574 unconvolved motion parameters from the realignment step, in order to covary out potential movement-  
575 related artifacts in the BOLD signal. All regressors of interest were convolved with the canonical  
576 hemodynamic response function (HRF). All GLM models included a high-pass filter to remove low-  
577 frequency artifacts from the data (cut-off = 128s) as well as a run-specific intercept. Temporal  
578 autocorrelation was modeled using an AR(1) process. All motor responses recorded were modeled using  
579 a zero-duration Dirac function. Voxel-wise thresholds used to generate SPM maps were either  
580  $p < 0.005^{\text{UNC}}$  (parametric contrasts) or  $p < 0.001^{\text{UNC}}$  (categorical contrasts), unless notified otherwise. All  
581 statistical inferences based on whole-brain analyses satisfied the standard multiple comparison  
582 threshold ( $p < 0.05^{\text{FWE}}$ ) at the cluster level.

583

584 In the first run (GLM1), the question, rating and outcome stages were modeled separately using  
585 boxcar functions set to the duration of each individual event. This decision to use boxcars was justified  
586 by an analysis of the residuals produced by the GLMs at the first level, compared with those from the  
587 homologous model using Dirac functions (difference in log-likelihood (LL) against homologous Dirac  
588 model: 271.7). Questions for which the participant did not know the answer were parametrically  
589 modulated by four regressors, orthogonalized in the following order:

590 1° Q{sur}: value of the surprise accumulator (see “Behavioral analyses” section, below).

591 2° Prior knowledge: 1 if target movie title had been watched by the participant, 0 otherwise.

592 3° Curiosity: value from 0 (excluded) to 1 (maximum curiosity).

593 4° Subsequent recall: 1 if item subsequently recalled, 0 otherwise.

594 At the outcome stage, answers and hash tags were also parametrically modulated using four regressors,  
595 orthogonalized in the following order:

596 1° Curiosity.

597 2° Prior knowledge.

598 3° Surprise prediction error (PE{sur}) or Surprise (see below).

599 4° Subsequent recall

600

601 Questions and answers for which participants knew the answer before starting the experiment  
602 were modeled separately and not included in any contrast, except for the contrast reported Fig. S2f. In  
603 order to uncover the neural correlates of surprise in the first run (i.e. only for Fig. 5f), surprise ratings  
604 were simply substituted to surprise prediction errors, keeping all other aspects of the analysis identical.

605

606 In the second run, questions and answers were both modeled using Dirac functions. Again, this  
607 decision was principled by the analysis of first-level residuals (difference in LL against homologous  
608 boxcar model: 23.0). We splitted questions and answers regressors as a function of their status in the

609 first run (i.e. items answered or not in run 1) and participants' ability to recall spontaneously the answer  
610 or not. This resulted in two "HIT" regressors (items previously answered and remembered, at the  
611 question and answer stages) and two "correct rejection" (CR) regressors (unanswered and correctly  
612 classified as such, also at both stages). Questions (HIT and CR) were parametrically modulated using 4  
613 regressors, orthogonalized in the following order:

- 614 1° Curiosity
- 615 2° Prior Knowledge
- 616 3° Surprise
- 617 4° Subsequent recall

618 Answers (HIT and CR) were also modulated using 4 regressors, orthogonalized in the following order:

- 619 1° Curiosity
- 620 2° Prior Knowledge
- 621 3° Surprise
- 622 4° Subsequent recall

623

624 Items which had been answered in the first run but could not be spontaneously recalled by the  
625 participants were modeled separately (MISS regressors). Items which were already known before  
626 starting the experiment were also modeled separately and not included in any analysis.

627

628 In the third run, we modelled the onset of hashtags, watched movies and unwatched movies  
629 separately using zero-duration Dirac functions. Given the short duration of each trial, we lowered the  
630 cut-off of the high-pass filter (64s instead of 128s).

631

632 Concerning ROI analyses, the mask used to extract effects from the peaks previously reported  
633 in the literature study the contribution of the rIPFC to uncertainty-driven exploration were 3mm-radius  
634 spheres centered around the MNI coordinates reported in the original papers (explicitly displayed on  
635 Fig. 4b). For the multiple ROIs analyses reported Fig. 5b-f, Fig. 6c and Fig. S2b-h, we used the  
636 following method: (i) clusters surviving a voxel-wise threshold of  $p < 0.05$ FWE were extracted from the  
637 [new answer>hashtag] contrast (run 1; dlPFC, vmPFC, HPC, STS, Precuneus), (ii) clusters surviving a  
638 cluster-wise threshold of  $p < 0.05$ FWE (voxel-wise threshold:  $p < 0.005$ unc) were extracted from the  
639 parametric curiosity contrasts at the question (dmPFC, IPL) and answer (ventral striatum) stages of run  
640 1. For each of the 8 regions, the mirror (x-flipped) ROI was added to the mask itself, so that every ROIs  
641 were strictly symmetric and identical across the two hemispheres. Finally, the nucleus accumbens mask  
642 (Fig. 6b) was based on an anatomical probabilistic atlas of the basal ganglia<sup>52</sup>.

643

644 Peristimulus time-course histograms (PSTH, sampled at 1Hz) were computed using the toolbox  
645 *rfxplot* for Matlab<sup>53</sup>. These time-decomposed effects were thus re-estimated using the first eigenvariate  
646 extracted from the regions of interest, after adjustment for run intercept and movement-related variance.

647

## 648 Behavioral analyses

649

650 The modeling of nonspecific EC levels as a function of epistemic surprise used the following  
651 delta-rule:

$$652 \quad Q_{t+1} = Q_t + \alpha(R - Q_t) \quad (\text{Equation 1})$$

653 where Q is initialized at 0 and updated on each trial by the prediction error term R-Q, times a learning  
654 rate  $\alpha$ . In the most simple model termed Q{0-1}, the delivery of an answer was coded as R=1 while the  
655 absence of answer was coded as R=0, so that the variable Q represents the amount of knowledge  
656 recently delivered to the participant, which enabled us to explore whether knowledge tended to reinforce  
657 or saturate curiosity over time. In the best-fitted model termed Q{sur}, the delivery of an answer was  
658 coded as R=S while the absence of answer was coded as R=0, with S corresponding to the surprise  
659 rating given by the participant for that particular item.

660

661 In order to ascertain that this approach was useful to explain variance in curiosity ratings, we  
662 compared a range of alternative models using a Bayesian group comparison approach (Fig. 4a, Fig.  
663 S1b-e), as implemented in the toolbox VBA<sup>24</sup> for Matlab (<http://mbb-team.github.io/VBA-toolbox/>).  
664 Alternative models were: Q{0-1}, Q{sur}, time, Q{0-1} & time, Q{sur} & time. The “time” model was  
665 used to ascertain that our delta-rule was not merely capturing a linear (increasing or decreasing) trend  
666 in curiosity ratings but rather an information-dependent process. An intercept was included in all  
667 models. Learning rates were treated as a fixed-effect in order to limit model complexity and facilitate  
668 the interpretation of individual differences and correlates of surprise accumulation. Subject-level  
669 estimations were performed using the *fitglm* algorithm provided in Matlab. When the fit was performed  
670 on continuous curiosity ratings, we assumed that those were normally distributed. However, because  
671 this assumption was violated in 4 participants, we also check that the same results could be observed  
672 using binarized curiosity levels (ie. superior or inferior to 50%, corresponding to the half-maximum of  
673 the curiosity gauge).

674

675 To confirm the complementary contributions of prior knowledge, surprise and curiosity in  
676 facilitating recall performance, we performed a Generalized Estimating Equations analysis (GEE)  
677 analysis, as implemented by SPSS 21 (<https://www.ibm.com/analytics/us/en/technology/spss/>).  
678 Successful recall was coded as 1 and unsuccessful recall as 0 and predicted by mean of a logistic

679 regression. The analysis included a participant-specific intercept, trivia id as a within-participant effects,  
680 and curiosity, prior knowledge and surprise as random effects.

681

682 The multi-level mediation analysis (Fig. 2e) was performed using the Mediation toolbox<sup>26</sup> for Matlab  
683 (<https://github.com/canlab/MediationToolbox>). Curiosity and surprise levels were z-scored for each  
684 participant separately, after removing items which were known to the participants before the experiment  
685 (according to post-scan task and responses given in run 1). Mediation path coefficients were estimated  
686 for each participant independently. Statistical inferences were drawn at the group level for each  
687 coefficient using a bias-corrected bootstrap significance test relaxing the normality assumption (10 000  
688 permutations). Averaged paths coefficient and standard deviations are reported directly on Fig. 2e.  
689 Individual path coefficients are reported on Fig S1a. The algorithm could not converge for 3  
690 participants, which were excluded, due to their high percentage of correct responses (above 90%). The  
691 condition (answers repeated or not during the trivia task) and the presence of prior knowledge (watched  
692 or unwatched status of the target movie) were included as covariates of non-interest. The mediation  
693 analysis performed on data from the prescreen experiment (Supplementary Fig. 3c) was not logistic (as  
694 it applied to continuous interest ratings) and it included no covariates.

695

696

#### 697 **ACKNOWLEDGEMENTS**

698 We are grateful to the staff of CERMEP–Imagerie du Vivant for helpful assistance with data collection  
699 and to the movie theater Comoedia (Lyon, France) for offering us the opportunity to perform the  
700 behavioral experiment in their premises. We must also thank Roshan Cools and three anonymous  
701 reviewers for their helpful comments on an earlier version of this manuscript.

702

#### 703 **AUTHOR CONTRIBUTIONS**

704 R.L and T.M designed and performed the experiments. R.L and T.M analyzed the behavioral data. R.L  
705 analyzed the fMRI data. R.L and T.M wrote the paper. M.M funded the experiments and participated  
706 in writing the paper.

707

#### 708 **COMPETING FINANCIAL INTERESTS**

709 The authors declare no competing financial interests.

710

711

712

713

## 714 References

715

- 716 1 Von Stumm S, Hell B, Chamorro-Premuzic T. The hungry mind intellectual curiosity is the third  
717 pillar of academic performance. *Perspect Psychol Sci* 2011;**6**:574–88.
- 718 2 Gottlieb J, Oudeyer P-Y, Lopes M, Baranes A. Information-seeking, curiosity, and attention:  
719 computational and neural mechanisms. *Trends Cogn Sci* 2013;**17**:585–93.
- 720 3 Kidd C, Hayden BY. The Psychology and Neuroscience of Curiosity. *Neuron* 2015;**88**:449–60.
- 721 4 Aristotle. *Metaphysics*. Ann Arbor, MI: University of Michigan Press; 1952.
- 722 5 Berlyne DE. A theory of human curiosity. *Br J Psychol* 1954;**45**:180–91.
- 723 6 Litman JA, Spielberg CD. Measuring epistemic curiosity and its diversive and specific  
724 components. *J Pers Assess* 2003;**80**:75–86.
- 725 7 Loewenstein G. The psychology of curiosity: A review and reinterpretation. *Psychol Bull*  
726 1994;**116**:75.
- 727 8 Friston K, Thornton C, Clark A. Free-energy minimization and the dark-room problem. *Front*  
728 *Psychol* 2012;**3**:130.
- 729 9 Clark A. Whatever next? Predictive brains, situated agents, and the future of cognitive science.  
730 *Behav Brain Sci* 2013;**36**:181–204.
- 731 10 Friston K, Rigoli F, Ognibene D, Mathys C, Fitzgerald T, Pezzulo G. Active inference and  
732 epistemic value. *Cogn Neurosci* 2015;**6**:187–214.
- 733 11 Schwartenbeck P, FitzGerald T, Dolan R, Friston K. Exploration, novelty, surprise, and free  
734 energy minimization. *Front Psychol* 2013;**4**:710.
- 735 12 Berlyne DE. Curiosity and exploration. *Science* 1966;**153**:25–33.
- 736 13 Litman JA. Relationships between measures of I- and D-type curiosity, ambiguity tolerance, and  
737 need for closure: An initial test of the wanting-liking model of information-seeking. *Pers Individ*  
738 *Dif* 2010;**48**:397–402.
- 739 14 Bateman TS, Hess AM. Different personal propensities among scientists relate to deeper vs.  
740 broader knowledge contributions. *Proc Natl Acad Sci U S A* 2015;**112**:3653–8.
- 741 15 Litman JA. Interest and deprivation factors of epistemic curiosity. *Pers Individ Dif*  
742 2008;**44**:1585–95.
- 743 16 Hirsh JB, Mar RA, Peterson JB. Psychological entropy: a framework for understanding  
744 uncertainty-related anxiety. *Psychol Rev* 2012;**119**:304–20.
- 745 17 Seymour B, O’Doherty JP, Koltzenburg M, Wiech K, Frackowiak R, Friston K, *et al*. Opponent  
746 appetitive-aversive neural processes underlie predictive learning of pain relief. *Nat Neurosci*  
747 2005;**8**:1234–40.
- 748 18 Kang MJ, Hsu M, Krajbich IM, Loewenstein G, McClure SM, Wang JT-Y, *et al*. The wick in the  
749 candle of learning: epistemic curiosity activates reward circuitry and enhances memory. *Psychol*  
750 *Sci* 2009;**20**:963–73.
- 751 19 Daddaoua N, Lopes M, Gottlieb J. Intrinsically motivated oculomotor exploration guided by  
752 uncertainty reduction and conditioned reinforcement in non-human primates. *Sci Rep*  
753 2016;**6**:20202.
- 754 20 Baranes A, Oudeyer P-Y, Gottlieb J. Eye movements reveal epistemic curiosity in human  
755 observers. *Vision Res* 2015;**117**:81–90.
- 756 21 Badre D, Doll BB, Long NM, Frank MJ. Rostrolateral prefrontal cortex and individual  
757 differences in uncertainty-driven exploration. *Neuron* 2012;**73**:595–607.
- 758 22 Donoso M, Collins AGE, Koechlin E. Human cognition. Foundations of human reasoning in the  
759 prefrontal cortex. *Science* 2014;**344**:1481–6.
- 760 23 Boorman ED, Behrens TEJ, Woolrich MW, Rushworth MFS. How green is the grass on the  
761 other side? Frontopolar cortex and the evidence in favor of alternative courses of action. *Neuron*  
762 2009;**62**:733–43.

- 763 24 Daw ND, O'Doherty JP, Dayan P, Seymour B, Dolan RJ. Cortical substrates for exploratory  
764 decisions in humans. *Nature* 2006;**441**:876–9.
- 765 25 Raja Beharelle A, Polanía R, Hare TA, Ruff CC. Transcranial Stimulation over Frontopolar  
766 Cortex Elucidates the Choice Attributes and Neural Mechanisms Used to Resolve Exploration–  
767 Exploitation Trade-Offs. *J Neurosci* 2015;**35**:14544–56.
- 768 26 Kumaran D, Maguire EA. Novelty signals: a window into hippocampal information processing.  
769 *Trends Cogn Sci* 2009;**13**:47–54.
- 770 27 Duncan K, Ketz N, Inati SJ, Davachi L. Evidence for area CA1 as a match/mismatch detector: a  
771 high-resolution fMRI study of the human hippocampus. *Hippocampus* 2012;**22**:389–98.
- 772 28 Berlyne DE. Uncertainty and epistemic curiosity. *Br J Psychol* 1962;**53**:27–34.
- 773 29 Stahl AE, Feigenson L. Observing the unexpected enhances infants' learning and exploration.  
774 *Science* 2015.
- 775 30 Ghosh VE, Moscovitch M, Melo Colella B, Gilboa A. Schema representation in patients with  
776 ventromedial PFC lesions. *J Neurosci* 2014;**34**:12057–70.
- 777 31 van Kesteren MTR, Beul SF, Takashima A, Henson RN, Ruiter DJ, Fernández G. Differential  
778 roles for medial prefrontal and medial temporal cortices in schema-dependent encoding: from  
779 congruent to incongruent. *Neuropsychologia* 2013;**51**:2352–9.
- 780 32 Garrido MI, Barnes GR, Kumaran D, Maguire EA, Dolan RJ. Ventromedial prefrontal cortex  
781 drives hippocampal theta oscillations induced by mismatch computations. *Neuroimage*  
782 2015;**120**:362–70.
- 783 33 van Kesteren MTR, Fernández G, Norris DG, Hermans EJ. Persistent schema-dependent  
784 hippocampal-neocortical connectivity during memory encoding and postencoding rest in  
785 humans. *Proceedings of the National Academy of Sciences* 2010;**107**:7550–5.
- 786 34 Bromberg-Martin ES, Hikosaka O. Midbrain dopamine neurons signal preference for advance  
787 information about upcoming rewards. *Neuron* 2009;**63**:119–26.
- 788 35 Pessiglione M, Seymour B, Flandin G, Dolan RJ, Frith CD. Dopamine-dependent prediction  
789 errors underpin reward-seeking behaviour in humans. *Nature* 2006;**442**:1042–5.
- 790 36 Gruber MJ, Gelman BD, Ranganath C. States of curiosity modulate hippocampus-dependent  
791 learning via the dopaminergic circuit. *Neuron* 2014;**84**:486–96.
- 792 37 Jepma M, Verdonschot RG, van Steenbergen H, Rombouts SARB, Nieuwenhuis S. Neural  
793 mechanisms underlying the induction and relief of perceptual curiosity. *Front Behav Neurosci*  
794 2012;**6**:5.
- 795 38 McGillivray S, Murayama K, Castel AD. Thirst for knowledge: The effects of curiosity and  
796 interest on memory in younger and older adults. *Psychol Aging* 2015;**30**:835–41.
- 797 39 O'Doherty JP, Dayan P, Friston K, Critchley H, Dolan RJ. Temporal difference models and  
798 reward-related learning in the human brain. *Neuron* 2003;**38**:329–37.
- 799 40 Berlyne DE. Curiosity and learning. *Motiv Emot* 1978;**2**:97–175.
- 800 41 Scimeca JM, Badre D. Striatal contributions to declarative memory retrieval. *Neuron*  
801 2012;**75**:380–92.
- 802 42 Jiang J, Summerfield C, Egnér T. Attention sharpens the distinction between expected and  
803 unexpected percepts in the visual brain. *J Neurosci* 2013;**33**:18438–47.
- 804 43 Aukstulewicz R, Friston K. Attentional Enhancement of Auditory Mismatch Responses: a  
805 DCM/MEG Study. *Cereb Cortex* 2015;**25**:4273–83.
- 806 44 Fernández RS, Boccia MM, Pedreira ME. The fate of memory: Reconsolidation and the case of  
807 Prediction Error. *Neurosci Biobehav Rev* 2016;**68**:423–41.
- 808 45 Lebreton M, Abitbol R, Daunizeau J, Pessiglione M. Automatic integration of confidence in the  
809 brain valuation signal. *Nat Neurosci* 2015;**18**:1159–67.
- 810 46 Blanchard TC, Hayden BY, Bromberg-Martin ES. Orbitofrontal cortex uses distinct codes for  
811 different choice attributes in decisions motivated by curiosity. *Neuron* 2015;**85**:602–14.
- 812 47 Shmuel A, Augath M, Oeltermann A, Logothetis NK. Negative functional MRI response  
813 correlates with decreases in neuronal activity in monkey visual area V1. *Nat Neurosci*  
814 2006;**9**:569–77.

- 815 48 Weitz AJ, Fang Z, Lee HJ, Fisher RS, Smith WC, Choy M, *et al.* Optogenetic fMRI reveals  
816 distinct, frequency-dependent networks recruited by dorsal and intermediate hippocampus  
817 stimulations. *Neuroimage* 2015;**107**:229–41.
- 818 49 Hayama HR, Rugg MD. Right dorsolateral prefrontal cortex is engaged during post-retrieval  
819 processing of both episodic and semantic information. *Neuropsychologia* 2009;**47**:2409–16.
- 820 50 Marvin CB, Shohamy D. Curiosity and reward: Valence predicts choice and information  
821 prediction errors enhance learning. *J Exp Psychol Gen* 2016;**145**:266–72.
- 822 51 Preuschoff K, 't Hart BM, Einhäuser W. Pupil Dilation Signals Surprise: Evidence for  
823 Noradrenaline's Role in Decision Making. *Front Neurosci* 2011;**5**:115.
- 824 52 Ahsan RL, Allom R, Gousias IS, Habib H, Turkheimer FE, Free S, *et al.* Volumes, spatial  
825 extents and a probabilistic atlas of the human basal ganglia and thalamus. *Neuroimage*  
826 2007;**38**:261–70.
- 827 53 Gläscher J. Visualization of group inference data in functional neuroimaging. *Neuroinformatics*  
828 2009;**7**:73–82.

829

830

831

832

833

834

835

836

837

838

839

840

841

842

843

844

845

846

847

848



849 **Figures**

850

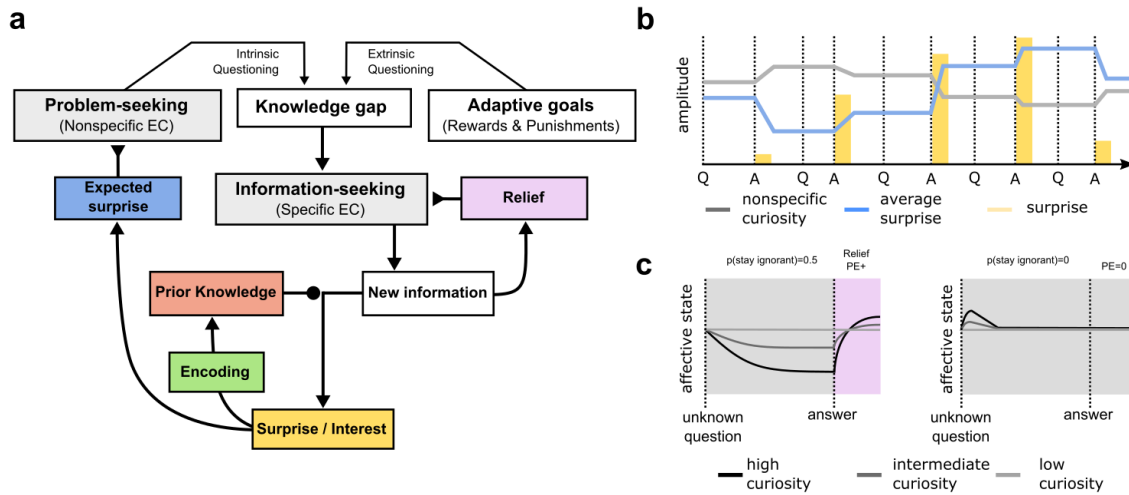

851

852 **Figure 1. An integrative model of epistemic curiosity (see also Table S1).** (a) Graphical

853 representation of the model. The model assumes that all information-seeking behaviors derive from the

854 awareness of a “knowledge gap”, resulting from either extrinsic questioning or intrinsic questioning.

855 Corresponding to the specific component of EC, information-seeking consists in exploring the

856 environment in order to gather new information. In turn, the comparison of new information with prior

857 knowledge can elicit epistemic surprise, thereby facilitating memory encoding and updating a dynamic

858 representation of the average surprise experienced in the environment controlling the evolution of

859 nonspecific EC levels. (b) Idealized opponency between nonspecific EC (in grey) and the average

860 amount of surprise experienced (in blue) during a series of questions (Q) and answers (A). The higher

861 this average surprise, the lower the motivational salience of new problems and questions, and vice-

862 versa. (c) Idealized representation of affective states as a function of (specific) EC intensity and the

863 probability of obtaining an answer. When answer delivery is uncertain, aversive states of ignorance may

864 last, so that answer delivery elicits a curiosity-dependent relief-prediction error. Oppositely, when

865 answer delivery is certain, higher curiosity levels predict are only associated with the anticipation of

866 more interesting and relevant information, which may translate into a positive affect.

867

868

869

870

871

872

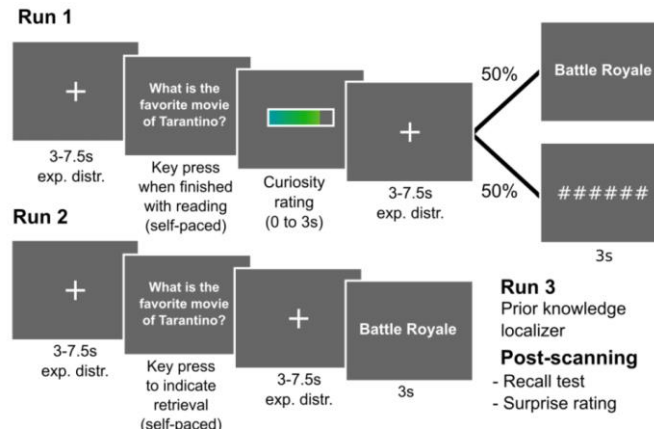

873

874 **Figure 2. Design of the fMRI study task.** In run 1, participants were presented with 60 prescreened  
875 trivia items (see also Table S2). After reporting curiosity on a non-numerical continuous gauge, they  
876 were presented with either the answer (for half of the trivias), or hashtags (for the other half). In run 2,  
877 participants were presented again with the 60 questions and reported whether the answer came  
878 spontaneously to their mind (HIT) or not (CR or MISS). Each answer was then revealed, so that half of  
879 the answers relieved curiosity whereas the other half merely echoed a previously encountered  
880 information. In run 3, participants were presented with an independent set of movie titles they had  
881 watched or not (prior knowledge localizer). Once outside the MRI scanner, they were finally asked to  
882 report all the answers they could remember and to rate their surprise and interest levels for each trivia  
883 answer.

884

885

886

887

888

889

890

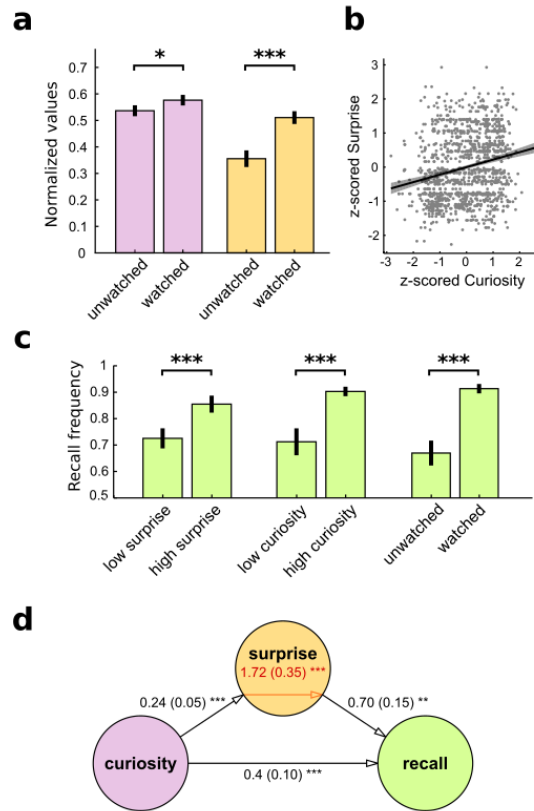

891

892 **Figure 3. Behavioral results (see also Fig. S1a).** (a) The presence of prior knowledge about target  
 893 answers (whether or not the participant had seen the movie before the experiment) was associated with  
 894 increased curiosity ratings (rose) and surprise ratings (yellow) in post-scan questionnaires (ratings  
 895 rescaled between 0 and 1). (b) Higher curiosity levels were also associated with increased surprise  
 896 ratings. (c) Recall performances were affected by surprise, curiosity and prior knowledge, as revealed  
 897 by median-split analyses. (d) Participant-wise mediation analyses demonstrated that curiosity induced  
 898 direct and surprise-mediated benefits for the ability to recall answers in the post-test task (logistic  
 899 mediation with unsuccessful recall coded as 0 and successful recall coded as 1, with prior knowledge  
 900 and repetition included as covariates). Error bars represent s.e.m.  $p < 0.05^*$ ,  $p < 0.01^{**}$ ,  $p < 0.001^{***}$ .

901

902

903

904

905

906

907

908

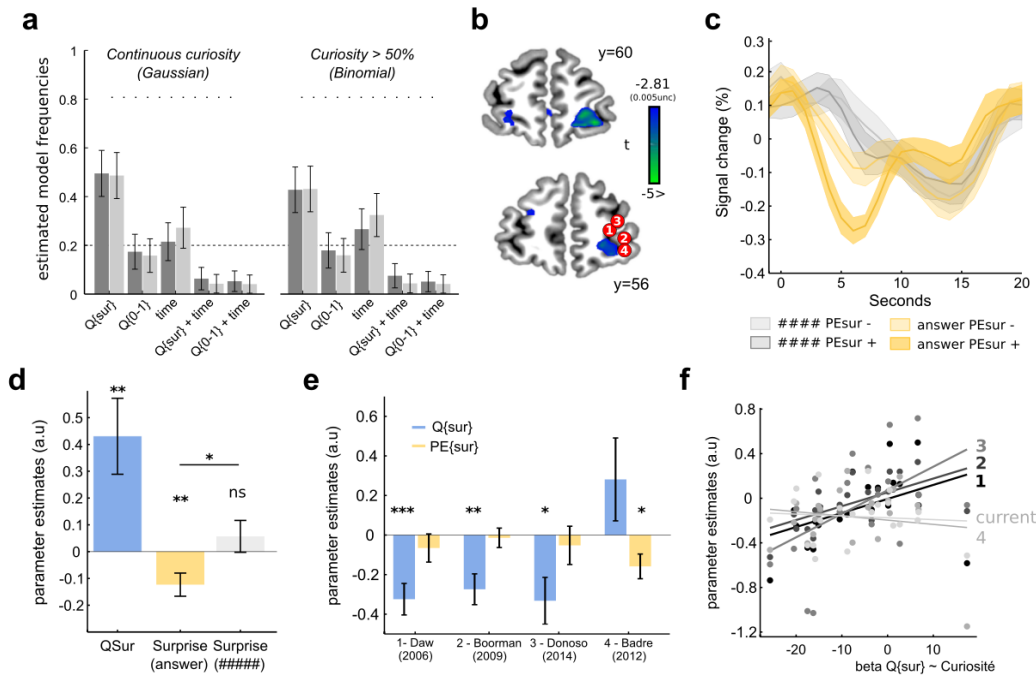

909

910 **Figure 3. Surprise-dependent control of curiosity and the rIPFC (see also Fig. S1b-e).** (a) The  
 911 model that updated on each trial the average amount of surprise recently experienced outperformed the  
 912 four alternative models tested to account for the evolution of curiosity ratings represented as Gaussian  
 913 or binomial variables, for both the Akaike (dark grey) and Bayesian (light grey) Information Criteria.  
 914 (b) Neural correlates of surprise prediction errors at the answer stage (run 1) in the right rostrolateral  
 915 prefrontal cortex (rIPFC;  $p < 0.05^{\text{FWE}}$ , MNI [18 62 -11]; SVC-corrected, prefrontal mask). This functional  
 916 cluster was close but did not overlap the activation peaks reported in the literature on uncertainty-driven  
 917 exploration (1: MNI [27 57 6]<sup>24</sup>, 2: MNI [36, 54, 0]<sup>23</sup>, 3: MNI [32 56 12]<sup>22</sup>, 4: MNI [35 56 -8]<sup>21</sup>). (c)  
 918 Finite Impulse Response modeling confirmed the presence of genuine rIPFC deactivations in responses  
 919 to stronger surprise prediction errors, occurring only when answers were actually delivered (yellow). (d)  
 920 The rIPFC also correlated with model-based estimates of average surprise ( $Q\{\text{sur}\}$ ) at the question stage  
 921 and with surprise itself when answers but not hashtag were delivered (3mm sphere around peak reported  
 922 in 4b). (e) The profile of activity at previously reported peaks 1-3 was markedly different from the peak  
 923 reported in 4b. Indeed, in these more lateral and posterior areas of the frontopolar cortex  $Q\{\text{sur}\}$  was  
 924 instead associated with pronounced deactivations at the question stage and no sign of  $PE\{\text{sur}\}$  encoding  
 925 was found at the group level. At peak 4 an intermediate pattern of activity was observed. (f) The  
 926 encoding of  $PE\{\text{sur}\}$  at peaks 1-3 was correlated with the the suppression of nonspecific curiosity by  
 927  $Q\{\text{sur}\}$ , as observed at the behavioral level.  $p < 0.05^*$ ,  $p < 0.01^{**}$ ,  $p < 0.001^{***}$  (two-tailed). Error bars  
 928 represent s.e.m. Plotted signals were extracted from 3mm-radius spheres centered around the peaks of  
 929 interest.

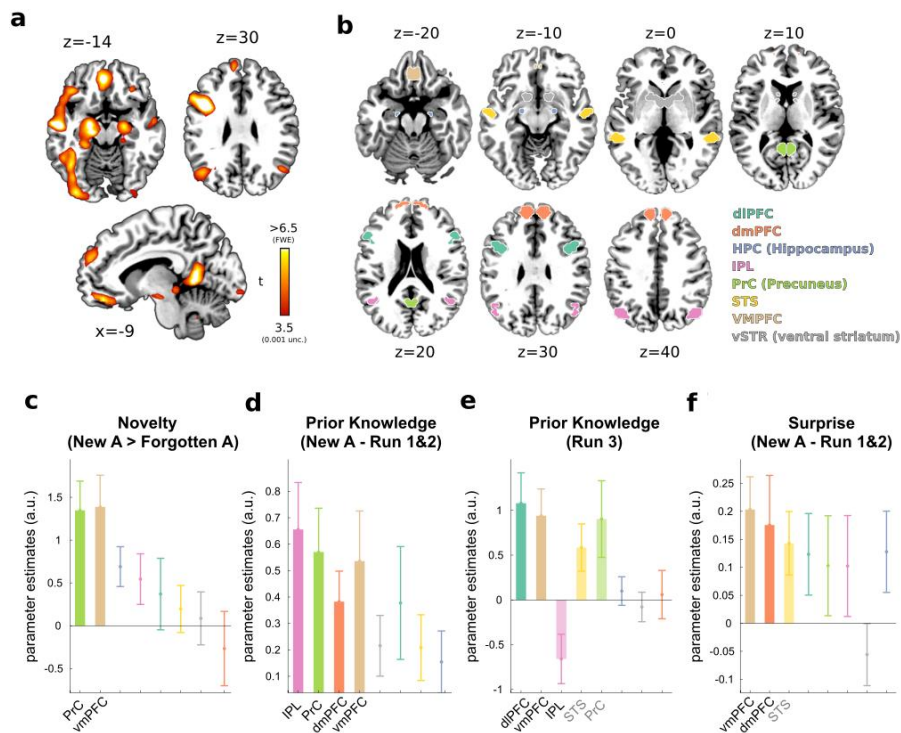

930

931 **Figure 5. Epistemic surprise signals deriving from the comparison of new information with prior**

932 **knowledge in the vmPFC (see also Fig. S2).** (a) Among other areas, the vmPFC was more activated

933 when processing new answers than hashtags (run 1,  $p < 0.05^{\text{FWE}}$ , MNI peak: [-3, 35, -17]) or old answers

934 (run 2, see Table S3). (b) Eight bilateral ROIs were systematically investigated to highlight the central

935 role of the vmPFC in the genesis of epistemic surprise (see also Fig. S2a and Fig. 6a). (c) Sensitivity to

936 information novelty was revealed by comparing new answers to old but forgotten answers in the second

937 run. (d) Encoding of prior knowledge pooled over the two runs of the trivia quiz when processing new

938 answers (watched *versus* unwatched movie titles). (e) Encoding of prior knowledge in the localizer task

939 which presented participants with a separate set of watched or unwatched movie titles, independently

940 of any trivia question (run 3). (f) Encoding of surprise ratings associated with new answers, pooled over

941 the two runs of the trivia quiz.

942 In graphs c-f, areas surviving the  $p(\text{FDR}) < 0.05$  are plotted with plain colors, areas significant only at

943 an uncorrected threshold ( $p < 0.05$ ) are plotted with half-transparent colors and non-significant effects

944 are reported using only error bars. Effect are ordered from left to right as a function of their significance.

945 Error bars represent s.e.m.

946

947

948

949

950

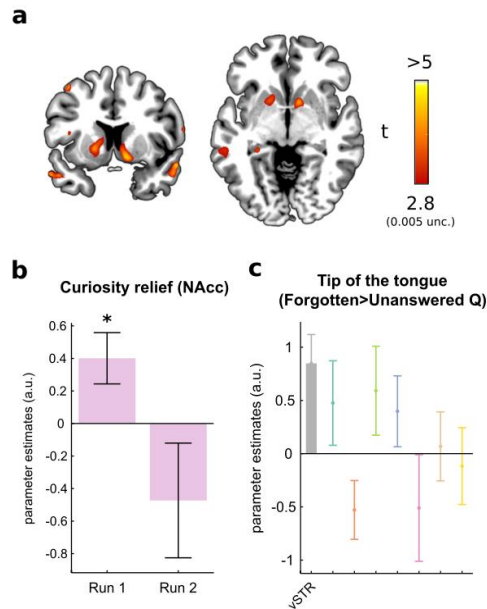

951

952 **Figure 6. Neural activities related to epistemic curiosity in the ventral striatum.** (a) Curiosity levels  
953 modulated ventral striatal responses to knowledge delivery during the stochastic trivia quiz (voxel-wise  
954 threshold:  $p=0.005^{\text{UNC}}$ ; cluster-wise threshold:  $p<0.05^{\text{FWE}}$ ; MNI peak: [-6 5 1]). (b) In the first run, the  
955 effect reported in (A) was also significant in the nucleus accumbens (NAcc) but it disappeared during  
956 the second part of the trivia quiz. (c) Among the 8 ROIs described in Fig. 5b (same color code), the  
957 ventral striatum was the only region to activate significantly more in response to old but forgotten  
958 questions in run 2, as compared to never answered questions.

959 Error bars represent s.e.m.  $p<0.05^*$  (two-tailed).
